# Supplementary material
Source: publisher site journal article supplement (https://www.dovepress.com/article/413545)

**Codes:**

```
library(DOSE)
library(enrichplot)
library(clusterProfiler)
library(org.Hs.eg.db)
https://www.jianshu.com/p/3c5de0c4ca7
ego <- enrichGO( gene = a$ENTREZID,
keyType = "ENTREZID",
OrgDb = org.Hs.eg.db,
ont = "CC",
pAdjustMethod = "BH",
pvalueCutoff = 0.05,
qvalueCutoff = 0.05,
readable = TRUE)
ekegg <- enrichKEGG(gene = a$ENTREZID)
edo<- enrichDO(gene = a$ENTREZID,readable = TRUE)
cnetplot(ego, foldChange=a$LFC, circular = TRUE, colorEdge = TRUE,showCategory = 10)
cell_markers <-
vroom::vroom('http://bio-bigdata.hrbmu.edu.cn/CellMarker/download/Human_cell_markers.txt'
) %>%
tidyr::unite("cellMarker", tissueType, cancerType, cellName, sep=", ") %>%
dplyr::select(cellMarker, geneID) %>%
dplyr::mutate(geneID = strsplit(geneID, ', '))
cell_markers
eTC <- enricher(a$ENTREZID, TERM2GENE=cell_markers, minGSSize=1)

library(ggplot2)
library(limma)
library(pheatmap)
logFCfilter=1
adjPfilter=0.05
expFile="geneMatrix.txt"
conFile="sample1.txt"
treatFile="sample2.txt"

rt=read.table(expFile,sep="\t",header=T,check.names=F)
rt=as.matrix(rt)
rownames(rt)=rt[,1]
exp=rt[,2:ncol(rt)]
dimnames=list(rownames(exp),colnames(exp))
data=matrix(as.numeric(as.matrix(exp)),nrow=nrow(exp),dimnames=dimnames)
data=avereps(data)
#data=log2(data+1)
data=normalizeBetweenArrays(data)
```

```

library(plyr)
library(ggplot2)
library(grid)
library(gridExtra)
files=grep(".xls",dir(),value=T)
data = lapply(files,read.delim)
names(data) = files
dataSet = ldply(data, data.frame)
dataSet$pathway = gsub(".xls","",dataSet$id)
gseaCol=c("#58CDD9","#7A142C","#5D90BA","#431A3D","#91612D","#6E568C","#E0367A","#D8
D155","#64495D","#7CC767","#223D6C","#D20A13","#FFD121","#088247","#11AA4D")
pGsea=ggplot(dataSet,aes(x=RANK.IN.GENE.LIST,y=RUNNING.ES,colour=pathway,group=pathway))
+
  geom_line(size = 1.5) + scale_color_manual(values = gseaCol[1:nrow(dataSet)]) +
  labs(x = "", y = "Enrichment Score", title = "") + scale_x_continuous(expand = c(0, 0)) +
  scale_y_continuous(expand = c(0, 0),limits = c(min(dataSet$RUNNING.ES - 0.02),
max(dataSet$RUNNING.ES + 0.02))) +
  theme_bw() + theme(panel.grid = element_blank()) + theme(panel.border = element_blank())
+ theme(axis.line = element_line(colour = "black")) + theme(axis.line.x =
element_blank(),axis.ticks.x = element_blank(),axis.text.x = element_blank()) +
  geom_hline(yintercept = 0) +
  guides(colour = guide_legend(title = NULL)) + theme(legend.background = element_blank()) +
theme(legend.key = element_blank())+theme(legend.key.size=unit(0.5,'cm'))
pGene=ggplot(dataSet,aes(RANK.IN.GENE.LIST,pathway,colour=pathway))+geom_tile()+
  scale_color_manual(values = gseaCol[1:nrow(dataSet)]) +
  labs(x = "High expression<----->Low expression", y = "", title = "") +
  scale_x_discrete(expand = c(0, 0)) + scale_y_discrete(expand = c(0, 0)) +
  theme_bw() + theme(panel.grid = element_blank()) + theme(panel.border = element_blank())
+ theme(axis.line = element_line(colour = "black"))+
  theme(axis.line.y = element_blank(),axis.ticks.y = element_blank(),axis.text.y =
element_blank())+ guides(color=FALSE)

gGsea = ggplot_gtable(ggplot_build(pGsea))
gGene = ggplot_gtable(ggplot_build(pGene))
maxWidth = grid::unit.pmax(gGsea$widths, gGene$widths)
gGsea$widths = as.list(maxWidth)
gGene$widths = as.list(maxWidth)
dev.off()

pdf('multipleGSEA.pdf',
    width=10,
    height=6)
par(mar=c(5,5,2,5))

```

```
grid.arrange(arrangeGrob(gGsea,gGene,nrow=2,heights=c(.8,.3))
dev.off()
```

```
sample1=read.table(conFile,sep="\t",header=F,check.names=F)
sample2=read.table(treatFile,sep="\t",header=F,check.names=F)
conData=data[,as.vector(sample1[,1])]
treatData=data[,as.vector(sample2[,1])]
rt=cbind(conData,treatData)
conNum=ncol(conData)
treatNum=ncol(treatData)
```

```
Type=c(rep("con",conNum),rep("treat",treatNum))
design <- model.matrix(~0+factor(Type))
colnames(design) <- c("con", "treat")
fit <- lmFit(rt,design)
cont.matrix<-makeContrasts(treat-con,levels=design)
fit2 <- contrasts.fit(fit, cont.matrix)
fit2 <- eBayes(fit2)
```

```
allDiff=topTable(fit2,adjust='fdr',number=200000)
write.table(allDiff,file="GEO_all.xls",sep="\t",quote=F)
```

```
diffSig=allDiff[with(allDiff, (abs(logFC)>logFCfilter & adj.P.Val < adjPfilter)), ]
diffSigOut=rbind(id=colnames(diffSig),diffSig)
write.table(diffSigOut,file="GEO_diff.xls",sep="\t",quote=F,col.names=F)
write.table(diffSigOut,file="GEO_diff.txt",sep="\t",quote=F,col.names=F)
```

```
geneNum=50
diffSig=diffSig[order(as.numeric(as.vector(diffSig$logFC))),]
diffGeneName=as.vector(rownames(diffSig))
diffLength=length(diffGeneName)
hmGene=c()
if(diffLength>(geneNum*2)){
  hmGene=diffGeneName[c(1:geneNum,(diffLength-geneNum+1):diffLength)]
}else{
  hmGene=diffGeneName
}
hmExp=rt[hmGene,]
Type=c(rep("N",conNum),rep("T",treatNum))
names(Type)=colnames(rt)
Type=as.data.frame(Type)
pdf(file="GEO_heatmap.pdf",height=8,width=10)
pheatmap(hmExp,
          annotation=Type,
```

```

        color = colorRampPalette(c("green", "black", "red"))(50),
        cluster_cols = F,
        show_colnames = F,
        scale="row",
        fontsize = 8,
        fontsize_row=6,
        fontsize_col=8)
dev.off()

Significant=ifelse((allDiff$adj.P.Val<adjPfilter      &      abs(allDiff$logFC)>logFCfilter),
ifelse(allDiff$logFC>logFCfilter,"Up", "Down"), "Not")
p = ggplot(allDiff, aes(logFC, -log10(adj.P.Val)))+
  geom_point(aes(col=Significant))+
  scale_color_manual(values=c("green", "black", "red"))+
  labs(title = "")+
  theme(plot.title = element_text(size = 16, hjust = 0.5, face = "bold"))
p=p+theme_bw()

pdf("GEO_vol.pdf",width=5.5,height=5)
print(p)
dev.off()

library(pROC)
inputFile="input.txt"
outFile="ROC.pdf"
rt=read.table(inputFile,header=T,sep="\t",check.names=F,row.names=1)
y=colnames(rt)[1]
rocobj1=roc(rt[,y], as.vector(rt[,x]))
pdf(file=outFile,width=5,height=5)
plot(rocobj1, print.auc=TRUE, col="red")
dev.off()
inputFile="1.txt"
gmtFile="immune.gmt"#GMT 文件

library(GSVA)
library(limma)
library(GSEABase)

rt=read.table(inputFile,sep="\t",header=T,check.names=F)
rt=as.matrix(rt)
rownames(rt)=rt[,1]
exp=rt[,2:ncol(rt)]
dimnames=list(rownames(exp),colnames(exp))
mat=matrix(as.numeric(as.matrix(exp)),nrow=nrow(exp),dimnames=dimnames)

```

```

mat=avereps(mat)
mat=mat[rowMeans(mat)>0,]
geneSet=getGmt(gmtFile,genelDType=SymbolIdentifier())

ssgseaScore=gsva(mat, geneSet, method='ssgsea', kcdf='Gaussian', abs.ranking=TRUE)
normalize=function(x){return((x-min(x))/(max(x)-min(x)))}
ssgseaOut=normalize(ssgseaScore)
ssgseaOut=rbind(id=colnames(ssgseaOut),ssgseaOut)
write.table(ssgseaOut,file="ssgseaOut.txt",sep="\t",quote=F,col.names=F)

exp = read.delim("1.txt", row.names = 1, header = T)
gene_set<-read.csv("mmc3.csv")[, 1:2]
head(gene_set)
list<- split(as.matrix(gene_set)[,1], gene_set[,2])
gsva_matrix<- gsva(as.matrix(exp), list,method='ssgsea',kcdf='Gaussian',abs.ranking=TRUE)
gsva_matrix1<- t(scale(t(gsva_matrix)))
gsva_matrix1[gsva_matrix1< -2] <- -2
gsva_matrix1[gsva_matrix1>2] <- 2
normalization<-function(x){
  return((x-min(x))/(max(x)-min(x)))}
nor_gsva_matrix1 <- normalization(gsva_matrix1)
write.csv(nor_gsva_matrix1,"nor_gsva_matrix.csv")

```

**Supplemental Table 1.** Primers used in the study.

| Gene symbol | Species |         | Sequence (5'-3')        |
|-------------|---------|---------|-------------------------|
| AQP9        | Human   | Forward | CTCTGAGTTCTTGGGCACGT    |
|             |         | Reverse | GCCATTGCAACTGCCATTGA    |
|             | Mouse   | Forward | AGGGATGGAGCTCAGGTCAT    |
|             |         | Reverse | ATCCCACCAGCCTTTTCTCG    |
| BACH2       | Human   | Forward | CCCAGCTCCTGAACAGTGAG    |
|             |         | Reverse | CTCCTCCTCTCCTGCAGAGT    |
|             | Mouse   | Forward | GTTTGCCTACACTGCCAAGC    |
|             |         | Reverse | CTGTTCAGGAGCTGGGTCTG    |
| CD4         | Human   | Forward | CCTGGTAGTAGCCCCTCAGT    |
|             |         | Reverse | GGCCTTCTGGAAAGCTAGCA    |
|             | Mouse   | Forward | TGTCACTCAAGGGAAGACGC    |
|             |         | Reverse | ATGCTGCCCCAGAATCTTCC    |
| IL17RE      | Human   | Forward | CACTGTTCCCGCTGTTTGTG    |
|             |         | Reverse | GCTGGCATCTTGTGTCTCCT    |
|             | Mouse   | Forward | CCTGTGTACAGCATCAGCCA    |
|             |         | Reverse | TCAAGAGCCCGAGGTGTCTA    |
| S100A9      | Human   | Forward | GCAAATGTTCGCAGCTGGAA    |
|             |         | Reverse | TGTGTCCAGGTCCTCCATGA    |
|             | Mouse   | Forward | ACCAGGACAATCAGCTGAGC    |
|             |         | Reverse | ACAGCCTTTGCCATGACTGT    |
| GAPDH       | Human   | Forward | GGAGCGAGATCCCTCCAAAAT   |
|             |         | Reverse | GGCTGTTGTCATACTTCTCATGG |
|             | Mouse   | Forward | AGGTCCGGTGTGAACGGATTTG  |
|             |         | Reverse | GGGTTCGTTGATGGCAACA     |
| SREBP1c     | Human   | Forward | CAGCGTCTACCATAGCCCTG    |
|             |         | Reverse | AAGGAGACGAGCACCAACAG    |
| FAS         | Human   | Forward | TCTGGTTCTTACGTCTGTTGC   |
|             |         | Reverse | CTGTGCAGTCCCTAGCTTTCC   |
| SCD1        | Human   | Forward | TCTAGCTCCTATACCACCACCA  |
|             |         | Reverse | TCGTCTCCAATTATCTCCTCC   |
| ACC         | Human   | Forward | ATGTCTGGCTTGACCTAGTA    |
|             |         | Reverse | CCCCAAAGCGAGTAACAAATTCT |

**Supplemental Table 2.** Top 15 significant immunological signature enriched in GSEA.

| Gene set name                                                                               | ES     | NES    | P value |
|---------------------------------------------------------------------------------------------|--------|--------|---------|
| LI PBMC MENOMUNE A C Y W 135 AGE 18 45YO 3DY DN                                             | -0.785 | -1.546 | < 0.001 |
| GSE46606 UNSTIM VS CD40L IL2 IL5 DAY1 STIMULATED BCELL UP                                   | -0.604 | -1.529 | < 0.001 |
| GSE45739 NRAS KO VS WT ACD3 ACD28 STIM CD4 TCELL DN                                         | -0.578 | -1.486 | < 0.001 |
| HARALAMBIEVA PBMC TIV AGE 50 74YO CORRELATED WITH MEMORY<br>B CELL RESPONSE 28DY NEGATIVE   | -0.681 | -1.465 | 0.016   |
| GSE9006 TYPE 1 VS TYPE 2 DIABETES PBMC AT DX UP                                             | 0.627  | 1.453  | 0.004   |
| GAUCHER PBMC YF VAX STAMARIL UNKNOWN AGE 14DY UP                                            | 0.663  | 1.452  | 0.019   |
| OCONNOR PBMC MENVEO ACWYVAX AGE 30 70YO 7DY AFTER<br>SECOND DOSE VS 7DY AFTER FIRST DOSE UP | 0.598  | 1.441  | < 0.001 |
| GSE22886 IGM MEMORY BCELL VS BM PLASMA CELL DN                                              | 0.565  | 1.441  | < 0.001 |
| GSE22103 UNSTIM VS LPS STIM NEUTROPHIL DN                                                   | 0.539  | 1.429  | < 0.001 |
| GSE1432 CTRL VS IFNG 1H MICROGLIA UP                                                        | 0.535  | 1.429  | < 0.001 |
| GSE8384 CTRL VS B ABORTUS 4H MAC CELL LINE DN                                               | 0.515  | 1.423  | 0.017   |
| GSE22886 NAIVE BCELL VS BM PLASMA CELL DN                                                   | 0.564  | 1.418  | < 0.001 |
| GSE9006 TYPE 1 DIABETES AT DX VS 4MONTH POST DX PBMC UP                                     | 0.584  | 1.417  | 0.023   |
| GSE46606 UNSTIM VS CD40L IL2 IL5 DAY3 STIMULATED BCELL UP                                   | -0.582 | -1.414 | 0.025   |
| GSE40274 CTRL VS FOXP3 AND EOS TRANSDUCED ACTIVATED CD4<br>TCELL DN                         | 0.579  | 1.412  | 0.010   |

GSEA, gene set enrichment analysis; ES, enrichment score; NES, normalized enrichment score.

## ***Hep G2 cells STR report***

**Method:** An appropriate amount of Hep G2 cells (Cell number PC-H2023011103,  $1 \times 10^6$ ) were used Microread Genomic DNA Kit to extract DNA, 20 STR loci and gender identification loci were amplified by Microreader™21 ID System, PCR product detection was performed by GenReader 7010 genetic analyzer, detection results were analyzed by GeneMapper Software6 (Applied Biosystems), and compared with ATCC, DSMZ, JCRB, ExPASy and other databases.

### **Experimental result:**

1. The results of negative and positive control were correct.
2. The genotyping results of STR locus of Hep G2 cell line is shown in the following table.

### **Conclusion:**

1. The genomic DNA of Hep G2 cell line is clear and the result of genotyping is good.
2. The results of STR typing showed that no cross contamination of human cell was found in the cell line of Hep G2 cell line.
3. The DNA typing of the cell line was 97.06% matched with the cell type in the cell bank, and the cell line name was Hep G2.



**Appendix I: The genotyping results of STR locus of Hep G2 cell line.**

| STR Loci                                                                                                                                                                                               | Sample: PC-H2023011103 | Database: Hep G2 |
|--------------------------------------------------------------------------------------------------------------------------------------------------------------------------------------------------------|------------------------|------------------|
| Amelogenin                                                                                                                                                                                             | X,Y                    | X,Y              |
| CSF1PO                                                                                                                                                                                                 | 10,11                  | 10,11            |
| D2S1338                                                                                                                                                                                                | 19,20                  | 19,20            |
| D3S1358                                                                                                                                                                                                | 15,16                  | 15,16            |
| D5S818                                                                                                                                                                                                 | 11,12                  | 11,12            |
| D7S820                                                                                                                                                                                                 | 10                     | 10               |
| D8S1179                                                                                                                                                                                                | 15,16                  | 15,16            |
| D13S317                                                                                                                                                                                                | 9,13                   | 9,13             |
| D16S539                                                                                                                                                                                                | 12                     | 12,13            |
| D18S51                                                                                                                                                                                                 | 13,14                  | 13,14            |
| D19S433                                                                                                                                                                                                | 15.2                   | 15.2             |
| D21S11                                                                                                                                                                                                 | 29,31                  | 29,31            |
| FGA                                                                                                                                                                                                    | 22,25                  | 22,25            |
| PentaD                                                                                                                                                                                                 | 9,13                   | 9,13             |
| PentaE                                                                                                                                                                                                 | 15,20                  | 15,20            |
| TH01                                                                                                                                                                                                   | 9                      | 9                |
| TPOX                                                                                                                                                                                                   | 8,9                    | 8,9              |
| vWA                                                                                                                                                                                                    | 17                     | 17               |
| D6S1043                                                                                                                                                                                                | 13                     |                  |
| D12S391                                                                                                                                                                                                | 21,25,26               | 21,25            |
| D2S411                                                                                                                                                                                                 | 11.3,14                | 11.3,14          |
| The ExpASy database has a matching rate of 98.51%, The number of matched bits is 19<br>( <a href="https://web.expasy.org/cellosaurus-str-search/">https://web.expasy.org/cellosaurus-str-search/</a> ) |                        |                  |

**Note:**

1. According to the cell STR identification standard established by the International Cell Line Authentication Committee (ICLAC), when the matching degree of cell lines is  $\geq 80\%$ , they are considered to be correlated, that is, derived from common ancestral cells; The matching degree is between 55% and 80%, and the correlation needs to be further verified. Less than 55% indicates no correlation between the two.
2. The effective peak of the map was the real PCR band; Small peaks and nonspecific bands were ignored in the calculation.

## Appendix II: The genotyping results of STR locus of Hep G2 cell line.

Applied Biosystems  
GeneMapper Software 6

20230202

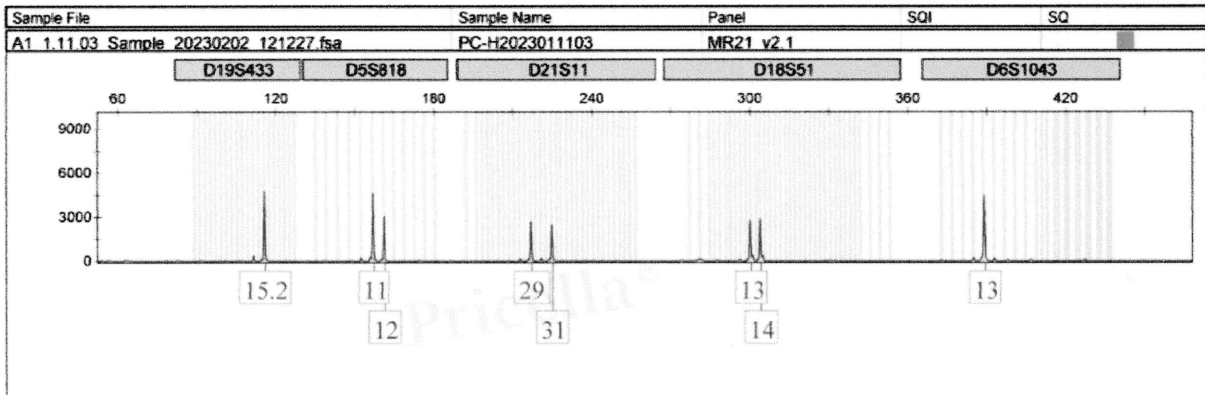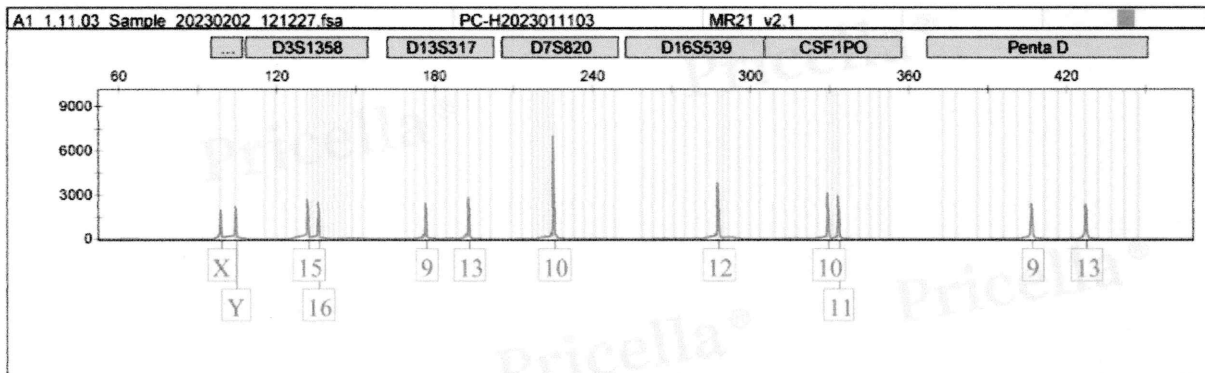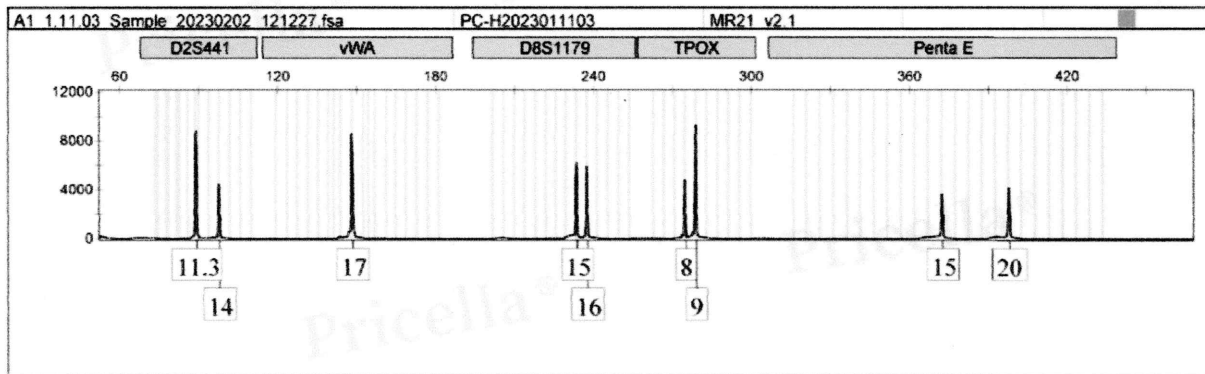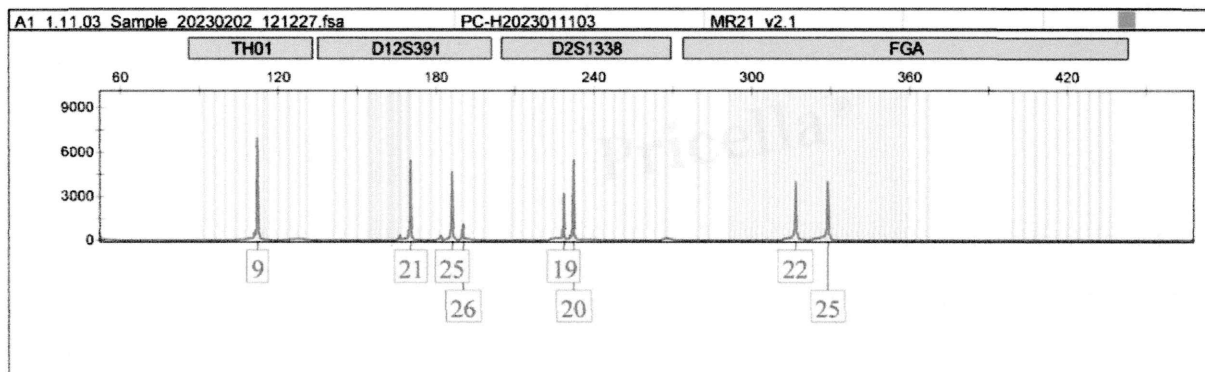

Supplement: Supplementary file 1 [file get_supplementary_file.php]
